# Supplementary material for: Elliptical ejecta of asteroid Dimorphos is due to its surface curvature
Source: Springer Nature journal article supplement (doi:10.1038/s41467-025-56010-w), 2025-02-14
Supplement: MOESM3 [file 41467_2025_56010_MOESM3_ESM.xlsx]

## Sheet: Figure 3a
Description:	The table below shows data for Figure 3a.
	Column B gives the azimuthal angle (x axis), and Columns C and D show the mean and standard deviation of the Z parameter (y axis).
	Azimuthal angle [deg]		Azimuthal angle of ejecta cone from projected Dimorphos's north
	Z (mean)		Mean of Z parameter
	Z (std)		Standard deviation of Z parameter
	Azimuthal angle [deg]	Z (mean)	Z (std)
	-177.5	3.1809	0.36829
	-172.5	3.1268	0.36342
	-167.5	3.0712	0.34762
	-162.5	3.0165	0.3335
	-157.5	2.9749	0.32051
	-152.5	2.9448	0.30999
	-147.5	2.9143	0.30309
	-142.5	2.8921	0.28902
	-137.5	2.8804	0.28494
	-132.5	2.8762	0.28719
	-127.5	2.8598	0.2844
	-122.5	2.8662	0.28492
	-117.5	2.8634	0.28154
	-112.5	2.8826	0.2849
	-107.5	2.8921	0.28257
	-102.5	2.9026	0.26929
	-97.5	2.9107	0.24929
	-92.5	2.934	0.24692
	-87.5	2.9426	0.23782
	-82.5	2.9466	0.22256
	-77.5	2.9628	0.21687
	-72.5	2.9628	0.21518
	-67.5	2.9531	0.21728
	-62.5	2.957	0.22395
	-57.5	2.9351	0.23691
	-52.5	2.9261	0.2293
	-47.5	2.8979	0.2473
	-42.5	2.8821	0.25997
	-37.5	2.8536	0.26567
	-32.5	2.823	0.27139
	-27.5	2.7967	0.27798
	-22.5	2.7495	0.2743
	-17.5	2.7105	0.27888
	-12.5	2.6786	0.27431
	-7.5	2.644	0.26926
	-2.5	2.6183	0.26605
	2.5	2.5889	0.25128
	7.5	2.5731	0.24455
	12.5	2.5586	0.24041
	17.5	2.554	0.23215
	22.5	2.5556	0.22908
	27.5	2.5675	0.22349
	32.5	2.5874	0.2246
	37.5	2.6074	0.22339
	42.5	2.6453	0.23483
	47.5	2.6817	0.24551
	52.5	2.7281	0.25078
	57.5	2.7717	0.25505
	62.5	2.8316	0.27043
	67.5	2.9004	0.28284
	72.5	2.9663	0.28673
	77.5	3.0328	0.2898
	82.5	3.1158	0.2984
	87.5	3.1851	0.29528
	92.5	3.257	0.29169
	97.5	3.3335	0.2902
	102.5	3.3814	0.28303
	107.5	3.454	0.28591
	112.5	3.4967	0.28218
	117.5	3.5445	0.27184
	122.5	3.5716	0.2724
	127.5	3.5998	0.27536
	132.5	3.6017	0.2793
	137.5	3.5977	0.2937
	142.5	3.5738	0.30033
	147.5	3.574	0.31916
	152.5	3.5297	0.33427
	157.5	3.4936	0.3404
	162.5	3.4308	0.36625
	167.5	3.3811	0.3737
	172.5	3.3147	0.37644
	177.5	3.2502	0.37639

## Sheet: Figure 3b
Description:	The table below shows data for Figure 3b.
	Column B gives the azimuthal angle (x axis), and Columns C and D show the mean and standard deviation of the α parameter (y axis).
	Azimuthal angle [deg]		Azimuthal angle of ejecta cone from projected Dimorphos's north
	α (mean) [hm^(Z+1)/s]		Mean of α parameter
	α (std) [hm^(Z+1)/s]		Standard deviation of α parameter
	Azimuthal angle [deg]	α (mean)	α (std)
	-177.5	0.00018711	0.00013581
	-172.5	0.00021255	0.00015071
	-167.5	0.00023158	0.00016113
	-162.5	0.00026316	0.00017826
	-157.5	0.00029569	0.00019365
	-152.5	0.00031995	0.00020918
	-147.5	0.00034776	0.00021696
	-142.5	0.00038163	0.00023302
	-137.5	0.00040926	0.00024176
	-132.5	0.00043318	0.00024766
	-127.5	0.00044535	0.00025416
	-122.5	0.00045393	0.0002508
	-117.5	0.0004656	0.00025126
	-112.5	0.00047456	0.00025662
	-107.5	0.00047893	0.00025721
	-102.5	0.00046344	0.00025402
	-97.5	0.00045876	0.00024667
	-92.5	0.00044434	0.00024236
	-87.5	0.00041606	0.00022853
	-82.5	0.00039162	0.00022188
	-77.5	0.0003763	0.00022438
	-72.5	0.00032301	0.00019666
	-67.5	0.00029556	0.00018372
	-62.5	0.00026272	0.00015973
	-57.5	0.00023634	0.00014686
	-52.5	0.00021052	0.00013219
	-47.5	0.00019249	0.00012929
	-42.5	0.00018398	0.00012035
	-37.5	0.00018029	0.00012651
	-32.5	0.00017758	0.00013035
	-27.5	0.00018219	0.00013357
	-22.5	0.00018468	0.00014161
	-17.5	0.00019297	0.00014923
	-12.5	0.00020798	0.00016338
	-7.5	0.00022519	0.00017659
	-2.5	0.00023892	0.0001835
	2.5	0.00025632	0.00018799
	7.5	0.0002726	0.00019423
	12.5	0.00028721	0.00019443
	17.5	0.00029842	0.00019198
	22.5	0.0003101	0.00018943
	27.5	0.00032828	0.00019457
	32.5	0.00034662	0.00020784
	37.5	0.00036221	0.00021597
	42.5	0.00038043	0.00022154
	47.5	0.00038999	0.0002189
	52.5	0.00040287	0.00022903
	57.5	0.00042019	0.00024009
	62.5	0.00041758	0.00023219
	67.5	0.00041488	0.0002386
	72.5	0.00041127	0.00024619
	77.5	0.00040255	0.00022953
	82.5	0.00037909	0.00022047
	87.5	0.00036706	0.00021883
	92.5	0.00032887	0.00021052
	97.5	0.00029641	0.00019439
	102.5	0.00025852	0.0001725
	107.5	0.00022623	0.00015135
	112.5	0.00018912	0.00013328
	117.5	0.00016153	0.00011574
	122.5	0.00014455	0.0001054
	127.5	0.00012724	9.7727e-05
	132.5	0.00011617	9.4818e-05
	137.5	0.0001109	9.4052e-05
	142.5	0.0001018	8.7636e-05
	147.5	0.00010319	8.4093e-05
	152.5	0.00010876	9.0029e-05
	157.5	0.00011572	9.4854e-05
	162.5	0.00012305	0.00010083
	167.5	0.00013298	0.00010385
	172.5	0.0001485	0.00011669
	177.5	0.00016889	0.0001258

## Sheet: Figure 3c
Description:	The table below shows data for Figure 3c.
	Column B gives the azimuthal angle (x axis), Columns C and D show the mean and standard deviation of rE* (y axis),
	and Columns E and F show the mean and standard deviation of rE* sin(ΔE*) (y axis).
	Azimuthal angle [deg]		Azimuthal angle of ejecta cone from projected Dimorphos's north
	rE* (mean)		Mean of rE* (given as a blue line)
	rE* (std)		Standard deviation of rE* (given as a blue line)
	rE* sin(ΔE*) (mean)		Mean of rE* sin(ΔE*) (given as a red line)
	rE* sin(ΔE*) (std)		Standard deviation of rE* sin(ΔE*) (given as a red line)
	Azimuthal angle [deg]	rE* (mean) (blue)	rE* (std) (blue)	rE* sin(ΔE*) (mean) (red)	rE* sin(ΔE*) (std) (red)
	-177.5	0.059858	0.012189	0.047614	0.0076344
	-172.5	0.061836	0.012502	0.04892	0.0076234
	-167.5	0.062939	0.012815	0.049759	0.0077818
	-162.5	0.064991	0.013145	0.051258	0.0080407
	-157.5	0.067188	0.01338	0.053142	0.0083415
	-152.5	0.068688	0.013711	0.054627	0.0086684
	-147.5	0.07055	0.013847	0.056512	0.0088698
	-142.5	0.07273	0.014451	0.05871	0.0094011
	-137.5	0.074858	0.014835	0.060939	0.0098829
	-132.5	0.076732	0.014875	0.063137	0.010245
	-127.5	0.077434	0.015124	0.064576	0.010367
	-122.5	0.078366	0.014562	0.06634	0.010137
	-117.5	0.079257	0.014661	0.067822	0.010266
	-112.5	0.080069	0.015153	0.069167	0.010592
	-107.5	0.080599	0.015224	0.070175	0.010559
	-102.5	0.079947	0.015185	0.070283	0.010561
	-97.5	0.079902	0.015395	0.070646	0.010721
	-92.5	0.079318	0.015074	0.070209	0.01059
	-87.5	0.077736	0.014502	0.069195	0.010266
	-82.5	0.07604	0.014589	0.067622	0.010398
	-77.5	0.074909	0.014795	0.066128	0.010421
	-72.5	0.071244	0.013865	0.063077	0.0099569
	-67.5	0.068836	0.013822	0.060838	0.010044
	-62.5	0.066238	0.012914	0.058093	0.0093186
	-57.5	0.063472	0.012513	0.055528	0.0090239
	-52.5	0.060822	0.01193	0.052925	0.0085001
	-47.5	0.05819	0.011632	0.050312	0.007936
	-42.5	0.057075	0.010559	0.048894	0.0071655
	-37.5	0.05583	0.010331	0.047341	0.0066828
	-32.5	0.054462	0.010706	0.045693	0.0066013
	-27.5	0.054003	0.010433	0.044793	0.0063345
	-22.5	0.052724	0.010553	0.043451	0.0062539
	-17.5	0.052163	0.010046	0.042741	0.0059666
	-12.5	0.052291	0.010337	0.042324	0.0059848
	-7.5	0.052363	0.010507	0.042101	0.0060621
	-2.5	0.052467	0.010443	0.041989	0.0060656
	2.5	0.052882	0.010545	0.04213	0.0062745
	7.5	0.05359	0.010441	0.042607	0.0061544
	12.5	0.054149	0.01111	0.042923	0.0065136
	17.5	0.055177	0.011179	0.043599	0.0065814
	22.5	0.056429	0.011498	0.044509	0.0068148
	27.5	0.058484	0.011621	0.045901	0.0068774
	32.5	0.060386	0.011666	0.047403	0.0068633
	37.5	0.062471	0.012098	0.048966	0.007082
	42.5	0.065238	0.01258	0.051117	0.0075662
	47.5	0.067577	0.012858	0.053061	0.0077898
	52.5	0.070157	0.013252	0.055254	0.0078491
	57.5	0.072756	0.012998	0.057805	0.0076458
	62.5	0.074443	0.013249	0.059851	0.0078907
	67.5	0.075759	0.013775	0.061597	0.0080213
	72.5	0.076378	0.014578	0.062986	0.0087913
	77.5	0.077212	0.01362	0.064595	0.0082702
	82.5	0.076635	0.013306	0.064999	0.0083479
	87.5	0.076602	0.01327	0.065407	0.0083981
	92.5	0.074432	0.013826	0.064289	0.0092829
	97.5	0.072818	0.013446	0.063349	0.0094199
	102.5	0.070416	0.012928	0.061492	0.0092617
	107.5	0.068431	0.012731	0.059859	0.0094663
	112.5	0.065225	0.012408	0.057233	0.0095009
	117.5	0.062889	0.011785	0.055024	0.0092157
	122.5	0.061004	0.0118	0.053241	0.009333
	127.5	0.058864	0.011795	0.051169	0.0092876
	132.5	0.057181	0.01151	0.04941	0.0088529
	137.5	0.056108	0.011468	0.048143	0.0087037
	142.5	0.054432	0.010963	0.046482	0.0081208
	147.5	0.054555	0.010869	0.046077	0.0080771
	152.5	0.054605	0.011076	0.045687	0.0079245
	157.5	0.055011	0.011262	0.045572	0.0078161
	162.5	0.055177	0.011281	0.045377	0.0077253
	167.5	0.055967	0.011353	0.045593	0.0076323
	172.5	0.056901	0.011893	0.045961	0.0077703
	177.5	0.058594	0.012114	0.046941	0.0078389

## Sheet: Figure 3d
Description:	The table below shows data for Figure 3d.
	Column B gives the azimuthal angle (x axis), and Columns C and D show the mean and standard deviation of the geometric factor (y axis).
	Azimuthal angle [deg]		Azimuthal angle of ejecta cone from projected Dimorphos's north
	Geometric factor (mean)		Mean of geometric factor
	Geometric factor (std)		Standard deviation of geometric factor
	Azimuthal angle [deg]	Geometric factor (mean)	Geometric factor (std)
	-177.5	0.012461	0.54793
	-172.5	-0.036375	0.57524
	-167.5	-0.065793	0.57883
	-162.5	-0.10932	0.61594
	-157.5	-0.12072	0.63438
	-152.5	-0.096749	0.63322
	-147.5	-0.073068	0.6491
	-142.5	-0.0017888	0.60307
	-137.5	0.071253	0.56823
	-132.5	0.17003	0.50574
	-127.5	0.26373	0.44125
	-122.5	0.38133	0.37328
	-117.5	0.47251	0.32776
	-112.5	0.57014	0.27645
	-107.5	0.63782	0.24998
	-102.5	0.70483	0.2215
	-97.5	0.75985	0.1929
	-92.5	0.78892	0.17
	-87.5	0.82248	0.15609
	-82.5	0.85166	0.15763
	-77.5	0.8577	0.1479
	-72.5	0.87834	0.15308
	-67.5	0.89091	0.14795
	-62.5	0.89358	0.14745
	-57.5	0.9059	0.16558
	-52.5	0.90801	0.17293
	-47.5	0.90952	0.1801
	-42.5	0.90341	0.18405
	-37.5	0.89536	0.20638
	-32.5	0.88039	0.24095
	-27.5	0.86129	0.23965
	-22.5	0.8433	0.27885
	-17.5	0.81526	0.29686
	-12.5	0.76	0.332
	-7.5	0.70699	0.36983
	-2.5	0.63923	0.40206
	2.5	0.56047	0.42727
	7.5	0.48617	0.46384
	12.5	0.42109	0.49771
	17.5	0.34523	0.50989
	22.5	0.27493	0.54271
	27.5	0.19961	0.56864
	32.5	0.14793	0.60636
	37.5	0.12179	0.62494
	42.5	0.09521	0.63812
	47.5	0.071068	0.67175
	52.5	0.10692	0.643
	57.5	0.12701	0.6248
	62.5	0.19047	0.59116
	67.5	0.26282	0.50449
	72.5	0.33493	0.44878
	77.5	0.39073	0.36199
	82.5	0.44381	0.27907
	87.5	0.47318	0.23453
	92.5	0.50153	0.21658
	97.5	0.52001	0.18688
	102.5	0.52318	0.17549
	107.5	0.53368	0.16521
	112.5	0.53564	0.16385
	117.5	0.52655	0.16104
	122.5	0.52288	0.16033
	127.5	0.51327	0.16872
	132.5	0.49613	0.18018
	137.5	0.47181	0.19078
	142.5	0.44828	0.21391
	147.5	0.41933	0.26027
	152.5	0.37232	0.29737
	157.5	0.3379	0.33276
	162.5	0.268	0.40769
	167.5	0.21569	0.43361
	172.5	0.15028	0.47631
	177.5	0.075762	0.53101

## Sheet: Figure 4a
Description:	The table below shows data for Figure 4a.
	Column B gives the aspect ratio (x axis), Column C shows the minimum cohesive strength (y axis), and Column D gives the color .
	Radius [m]		Equivalent asteroid radius
	Minimum cohesive strength [Pa]		Lowest cohesive strength to avoid structural failure
	Geometric factor (mean)		Mean of geometric factor along the semi-minor axis in percentile
	Radius [m]	Minimum cohesive strenth [Pa]	Geometric factor (mean)
	10	63.858	0.7665
	11	2.8	0
	4.5	25.02	0
	44.5	647.26	79.898
	8.5	41.22	0
	44.5	4329.4	89.021
	5.5	51.485	0
	22	172.14	45.676
	21	223.45	42.739
	24.5	14321	83.659
	3.5	132.03	0
	10	64.621	0
	12.5	73.875	2.5363
	29.5	3789	83.027
	8	64.722	0
	12.5	1.0253	0
	31	20.406	34.848
	11.5	48.94	0
	8.5	473.06	12.697
	34	50.758	51.962
	14.5	1747.3	43.403
	7.5	1542.5	5.8632
	11	479.12	15.717
	2	65.158	0
	17	47.334	15.565
	29.5	129.98	48.82
	5.5	430.13	0
	31	108.19	50.663
	22	25.656	18.219
	11.5	586.45	15.412
	7.5	91.731	0
	17	1703.6	50.569
	5.5	37.1	0
	6.5	31.597	0
	9	22.874	0
	19.5	2.8979	1.7824
	31	32618	90.161
	18.5	7.4198	4.3633
	15.5	253.88	27.467
	22	1875.2	66.507
	19.5	204.73	37.429
	28	56191	90.701
	12	993.17	29.587
	22	5567	76.162
	12	2.1371	0
	15.5	8212.8	64.442
	11	234.57	7.0162
	5.5	398.55	0
	4	11.498	0
	8	2.9146	0
	18.5	1190.9	51.498
	16	16.003	2.4872
	35.5	1424.7	81.144
	4.5	3989	0
	14	0.028101	0
	24.5	1.0184	9.7804
	19.5	119.5	35.477
	28	1.1182	16.913
	3	65.369	0
	34	10.818	31.634
	14.5	22588	72.312
	22	680.2	57.018
	3	181.34	0
	5	7153.4	2.29
	5.5	14402	12.167
	25.5	131.05	43.865
	6.5	0.37575	0
	32.5	0.76652	31.488
	3	13.927	0
	12	22.766	8.0143
	49	6.3911	57.478
	22	20.424	17.824
	22	87240	91.602
	14	5343.1	55.085
	27	537.13	65.15
	20.5	6628.5	76.22
	12	610.61	25.094
	7.5	378.49	0
	9	201.24	7.3547
	16	0.68387	2.062
	19.5	0.043988	1.9699
	32.5	0.75207	30.998
	6.5	0.023368	0
	6	0.75228	0
	28	0.06874	14.606
	24.5	2.7429	13.693
	6.5	0.025093	0
	16	5.1764	0
	24.5	4.701	23.536
	39	6.741	38.37
	12	18.3	0
	15.5	4.7924	0
	29.5	3.8569	21.504
	27	3.8372	24.769
	17	7.4491	8.4146
	8	0.30399	0
	12	2.9572	0
	8	0.10537	0
	8.5	0.039961	0

## Sheet: Figure 4b
Description:	The table below shows data for Figure 4b.
	Column B gives the aspect ratio (x axis), Column C shows the minimum cohesive strength (y axis), and Column D gives the color .
	Radius [m]		Equivalent asteroid radius
	Minimum cohesive strength [Pa]		Lowest cohesive strength to avoid structural failure
	Geometric factor (std)		Standard deviation of geometric factor along the semi-minor axis in percentile
	Radius [m]	Minimum cohesive strenth [Pa]	Geometric factor (std)
	10	63.858	52.758
	11	2.8	47.214
	4.5	25.02	39.279
	44.5	647.26	25.646
	8.5	41.22	48.82
	44.5	4329.4	14.367
	5.5	51.485	39.921
	22	172.14	49.289
	21	223.45	50.646
	24.5	14321	18.427
	3.5	132.03	37.246
	10	64.621	55.283
	12.5	73.875	57.503
	29.5	3789	20.894
	8	64.722	49.522
	12.5	1.0253	44.694
	31	20.406	56.662
	11.5	48.94	54.893
	8.5	473.06	48.331
	34	50.758	46.266
	14.5	1747.3	49.739
	7.5	1542.5	56.41
	11	479.12	56.206
	2	65.158	29.441
	17	47.334	56.796
	29.5	129.98	50.173
	5.5	430.13	49.188
	31	108.19	48.696
	22	25.656	60.074
	11.5	586.45	59.049
	7.5	91.731	49.404
	17	1703.6	48.356
	5.5	37.1	44.244
	6.5	31.597	41.206
	9	22.874	48.973
	19.5	2.8979	57.611
	31	32618	12.447
	18.5	7.4198	57.409
	15.5	253.88	55.406
	22	1875.2	36.889
	19.5	204.73	53.836
	28	56191	11.664
	12	993.17	53.243
	22	5567	26.973
	12	2.1371	46.608
	15.5	8212.8	37.253
	11	234.57	56.832
	5.5	398.55	49.488
	4	11.498	36.259
	8	2.9146	43.526
	18.5	1190.9	48.254
	16	16.003	57.659
	35.5	1424.7	22.994
	4.5	3989	55.678
	14	0.028101	47.658
	24.5	1.0184	58.505
	19.5	119.5	52.346
	28	1.1182	57.946
	3	65.369	37.667
	34	10.818	59.636
	14.5	22588	28.883
	22	680.2	44.896
	3	181.34	37.629
	5	7153.4	53.375
	5.5	14402	55.818
	25.5	131.05	50.778
	6.5	0.37575	38.275
	32.5	0.76652	52.863
	3	13.927	30.055
	12	22.766	46.793
	49	6.3911	43.927
	22	20.424	58.773
	22	87240	6.455
	14	5343.1	43.699
	27	537.13	39.387
	20.5	6628.5	27.37
	12	610.61	53.797
	7.5	378.49	55.038
	9	201.24	50.52
	16	0.68387	49.33
	19.5	0.043988	55.158
	32.5	0.75207	53.211
	6.5	0.023368	39.014
	6	0.75228	37.443
	28	0.06874	58.893
	24.5	2.7429	57.479
	6.5	0.025093	38.445
	16	5.1764	56.888
	24.5	4.701	51.905
	39	6.741	55.922
	12	18.3	53.557
	15.5	4.7924	55.957
	29.5	3.8569	58.425
	27	3.8372	53.518
	17	7.4491	52.59
	8	0.30399	40.337
	12	2.9572	48.068
	8	0.10537	40.441
	8.5	0.039961	42.726

## Sheet: Figure 4c
Description:	The table below shows data for Figure 4c.
	Column B gives the aspect ratio (x axis), Column C shows the minimum cohesive strength (y axis), and Column D gives the color .
	Radius [m]		Equivalent asteroid radius
	Minimum cohesive strength [Pa]		Lowest cohesive strength to avoid structural failure
	Relative geometric factor (mean)		Mean of relative geometric factor along the semi-major axis to the semi-minor axis in percentile
	Radius [m]	Minimum cohesive strenth [Pa]	Relative geometric factor (mean)
	10	63.858	-17.514
	11	2.8	-7.7922
	4.5	25.02	-5.7836
	44.5	647.26	-6.2152
	8.5	41.22	-7.5232
	44.5	4329.4	-4.563
	5.5	51.485	-12.005
	22	172.14	-27.643
	21	223.45	-14.905
	24.5	14321	-7.4488
	3.5	132.03	-12.723
	10	64.621	-5.5106
	12.5	73.875	-2.149
	29.5	3789	-17.601
	8	64.722	-3.5763
	12.5	1.0253	-16.833
	31	20.406	-7.751
	11.5	48.94	-9.2714
	8.5	473.06	-46.047
	34	50.758	-16.156
	14.5	1747.3	-5.9964
	7.5	1542.5	-4.7682
	11	479.12	-10.619
	2	65.158	-2.552
	17	47.334	-11.502
	29.5	129.98	-1.6671
	5.5	430.13	-7.3943
	31	108.19	-4.8941
	22	25.656	-5.5014
	11.5	586.45	-2.2095
	7.5	91.731	-3.4143
	17	1703.6	-6.4495
	5.5	37.1	-2.5568
	6.5	31.597	-14.45
	9	22.874	-4.4098
	19.5	2.8979	-4.7145
	31	32618	-1.6674
	18.5	7.4198	-5.4658
	15.5	253.88	-13.571
	22	1875.2	-10.656
	19.5	204.73	-15.111
	28	56191	-2.479
	12	993.17	-12.894
	22	5567	-10.868
	12	2.1371	-9.9047
	15.5	8212.8	-6.1204
	11	234.57	-3.3093
	5.5	398.55	-3.7735
	4	11.498	-4.9171
	8	2.9146	-2.0931
	18.5	1190.9	-8.6477
	16	16.003	-4.2678
	35.5	1424.7	-13.862
	4.5	3989	-3.0283
	14	0.028101	-11.426
	24.5	1.0184	-6.0527
	19.5	119.5	-25.411
	28	1.1182	-6.7247
	3	65.369	-2.5006
	34	10.818	-1.5435
	14.5	22588	-8.4743
	22	680.2	-16.421
	3	181.34	-7.0739
	5	7153.4	-8.3123
	5.5	14402	-6.855
	25.5	131.05	-6.5194
	6.5	0.37575	-8.6346
	32.5	0.76652	-28.338
	3	13.927	-10.283
	12	22.766	-35.706
	49	6.3911	-24.04
	22	20.424	-7.0766
	22	87240	-22.608
	14	5343.1	-7.6321
	27	537.13	-20.799
	20.5	6628.5	-15.821
	12	610.61	-16.945
	7.5	378.49	-9.0281
	9	201.24	-30.001
	16	0.68387	-19.508
	19.5	0.043988	-12.505
	32.5	0.75207	-25.176
	6.5	0.023368	-2.3267
	6	0.75228	-5.5777
	28	0.06874	-5.3117
	24.5	2.7429	-10.255
	6.5	0.025093	-5.6536
	16	5.1764	-6.4014
	24.5	4.701	-40.116
	39	6.741	-6.2839
	12	18.3	-2.1577
	15.5	4.7924	-4.3368
	29.5	3.8569	-5.7129
	27	3.8372	-23.926
	17	7.4491	-25.428
	8	0.30399	-7.3813
	12	2.9572	-6.949
	8	0.10537	-6.1374
	8.5	0.039961	-2.6989

## Sheet: Figure 4d
Description:	The table below shows data for Figure 4d.
	Column B gives the aspect ratio (x axis), Column C shows the minimum cohesive strength (y axis), and Column D gives the color .
	Radius [m]		Equivalent asteroid radius
	Minimum cohesive strength [Pa]		Lowest cohesive strength to avoid structural failure
	Relative geometric factor (std)		Standard deviation of relative geometric factor along the semi-major axis to the semi-minor axis in percentile
	Radius [m]	Minimum cohesive strenth [Pa]	Relative geometric factor (std)
	10	63.858	15.988
	11	2.8	6.2629
	4.5	25.02	4.268
	44.5	647.26	11.432
	8.5	41.22	8.1041
	44.5	4329.4	9.6362
	5.5	51.485	9.5552
	22	172.14	26.211
	21	223.45	17.065
	24.5	14321	13.685
	3.5	132.03	8.0368
	10	64.621	6.3508
	12.5	73.875	2.7804
	29.5	3789	24.692
	8	64.722	4.1066
	12.5	1.0253	12.783
	31	20.406	10.359
	11.5	48.94	9.3845
	8.5	473.06	26.527
	34	50.758	18.799
	14.5	1747.3	7.61
	7.5	1542.5	5.7711
	11	479.12	10.972
	2	65.158	1.8166
	17	47.334	13.416
	29.5	129.98	2.5831
	5.5	430.13	8.1252
	31	108.19	7.2765
	22	25.656	7.2162
	11.5	586.45	2.7305
	7.5	91.731	3.9617
	17	1703.6	9.2174
	5.5	37.1	2.432
	6.5	31.597	10.332
	9	22.874	4.6486
	19.5	2.8979	5.9456
	31	32618	4.5366
	18.5	7.4198	6.5168
	15.5	253.88	15.084
	22	1875.2	14.527
	19.5	204.73	18.186
	28	56191	7.2624
	12	993.17	13.828
	22	5567	15.406
	12	2.1371	7.5653
	15.5	8212.8	9.1254
	11	234.57	4.191
	5.5	398.55	4.5899
	4	11.498	3.3987
	8	2.9146	2.4502
	18.5	1190.9	12.369
	16	16.003	5.5414
	35.5	1424.7	21.881
	4.5	3989	3.7252
	14	0.028101	8.6028
	24.5	1.0184	7.3056
	19.5	119.5	24.794
	28	1.1182	8.4452
	3	65.369	1.7076
	34	10.818	2.3288
	14.5	22588	11.677
	22	680.2	17.864
	3	181.34	4.5411
	5	7153.4	8.1222
	5.5	14402	7.5835
	25.5	131.05	8.2952
	6.5	0.37575	5.6011
	32.5	0.76652	24.679
	3	13.927	7.0342
	12	22.766	21.725
	49	6.3911	25.131
	22	20.424	8.3473
	22	87240	28.719
	14	5343.1	10.239
	27	537.13	23.931
	20.5	6628.5	20.408
	12	610.61	16.772
	7.5	378.49	9.6522
	9	201.24	19.743
	16	0.68387	14.292
	19.5	0.043988	11.135
	32.5	0.75207	21.766
	6.5	0.023368	1.5434
	6	0.75228	3.7514
	28	0.06874	6.884
	24.5	2.7429	11.364
	6.5	0.025093	3.7154
	16	5.1764	8.3993
	24.5	4.701	27.654
	39	6.741	9.0742
	12	18.3	2.3115
	15.5	4.7924	6.0257
	29.5	3.8569	6.9585
	27	3.8372	22.244
	17	7.4491	20.51
	8	0.30399	4.8852
	12	2.9572	6.4726
	8	0.10537	4.2566
	8.5	0.039961	2.9152

## Sheet: Figure 6a
Description:	The equations below show the lines described in Figure 6a (2022-09-26T23:17:19.100).
	Images are provided in the way that the center of figure of Dimorphos is at the center of the frame.
	xs	Horizontal direction of view geometry
	yup_south	Upper bound of the souther ejecta cone edge (cyan)
	ym_south	Mean of the souther ejecta cone edge (cyan)
	ylo_south	Lower bound of the souther ejecta cone edge (cyan)
	yup_north	Upper bound of the northern ejecta cone edge (yellow)
	ym_north	Mean of the northern ejecta cone edge (yellow)
	ylo_north	Lower bound of the northern ejecta cone edge (yellow)
	Quantity	Equation
	yup_south	1.48 * xs + 0.02
	ym_south	1.48 * xs + 0.00
	ylo_south	1.48 * xs - 0.02
	yup_north	5.67 * xs + 0.05
	ym_north	5.67 * xs + 0.00
	ylo_north	5.67 * xs - 0.05

## Sheet: Figure 6b
Description:	The equations below show the lines described in Figure 6b (2022-09-26T23:17:22.000).
	Images are provided in the way that the center of figure of Dimorphos is at the center of the frame.
	xs	Horizontal direction of view geometry
	yup_south	Upper bound of the souther ejecta cone edge (cyan)
	ym_south	Mean of the souther ejecta cone edge (cyan)
	ylo_south	Lower bound of the souther ejecta cone edge (cyan)
	yup_north	Upper bound of the northern ejecta cone edge (yellow)
	ym_north	Mean of the northern ejecta cone edge (yellow)
	ylo_north	Lower bound of the northern ejecta cone edge (yellow)
	Quantity	Equation
	yup_south	1.88 * xs + 0.02
	ym_south	1.88 * xs + 0.00
	ylo_south	1.88 * xs - 0.02
	yup_north	3.27 * xs + 0.02
	ym_north	3.27 * xs + 0.00
	ylo_north	3.27 * xs - 0.02

[truncated: 1 more sheets: Figure 7]
